# Supplementary material
Source: PubMed Central journal article supplement (PMC6437491)
Supplement: AAC.00057-19-s0001.pdf [file AAC.00057-19-s0001.pdf]

## SUPPLEMENTARY TABLES

**Table S1. Oligonucleotides used in this study**

| <b>Primer</b>        | <b>Sequence</b>                                                                                       |
|----------------------|-------------------------------------------------------------------------------------------------------|
| <b>qRT-PCR</b>       |                                                                                                       |
| ACT1-F               | 5'- GAAGGAGATCACTGCTTTAGCC -3'                                                                        |
| ACT1-R               | 5'- GAGCCACCAATCCACACAG -3'                                                                           |
| CDR1-F               | 5'- GAAATCTTGCACTTCCAGCCC -3'                                                                         |
| CDR1-R               | 5'- CATCAAGCAAGTAGCCACCG -3'                                                                          |
| CDR2-F               | 5'- GTCAACGGTAGCTGTGTG -3'                                                                            |
| CDR2-R               | 5'- GTCCCTCCACCGAGTATGG -3'                                                                           |
| MDR1-F               | 5'- GAAGTATGATGGCGGGTG -3'                                                                            |
| MDR1-R               | 5'- CCCAAGAGAGACGAGCCC -3'                                                                            |
| MDR2-F               | 5'- GGCGAGCTGTTGAGAATGTG -3'                                                                          |
| MDR2-R               | 5'- CTTTCATGGCTTGCAACCTTC -3'                                                                         |
| <b>Amplification</b> |                                                                                                       |
| CDR1_KO_RT-F         | 5'- CGTCTCCAACGTGCGCAACTCTCGCACAATACGCTATT<br>TGCCGCCAGAATTCCTATCTCATGccGGGTTTTCCCAGTC<br>ACGACGT -3' |
| CDR1_KO_RT-R         | 5'- GAAAGTTCTCTCTTTTCGAATTGCTTCACGTATTCGAATC<br>TTGAGTTAGCCATATTAAGGCGTGTGGAATTGTGAGCGG<br>AT -3'     |
| MDR1_KO_RT-F         | 5'- GTECTCCCGTCAAACCTCACGTAAGCCTTTTTCGTCTGCAC<br>CCAAACAAAGACGGGTTTTCCCAGTCACGACGT -3'                |
| MDR1_KO_RT-R         | 5'- CGTTAAATACTGGACATGCAACTGTCAAACGTAGAACT<br>TGAAAACACTAGGTGTGGAATTGTGAGCGGAT -3'                    |
| <b>Screening</b>     |                                                                                                       |
| CDR1_5'_SCN-F        | 5'- CCCGCTGGAAGTGGAGACTC -3'                                                                          |
| CDR1_ORF_SCN-F       | 5'- GGAGTCATGCCGTCATAGGAG -3'                                                                         |
| CDR1_3'_SCN-F        | 5'- GCTGAACTTATGGAACCCTTTGCC -3'                                                                      |
| MDR1_5'_SCN-F        | 5'- GACTGATTTAGGGAGACCTGGAAGG -3'                                                                     |
| MDR1_ORF_SCN-F       | 5'- CACCCACAGAAGCACCACC -3'                                                                           |
| MDR1_3'_SCN-F        | 5'- GCGAGGCACGGGTTTTGAG -3'                                                                           |
| pBSS2_SCN-R          | 5'- GTCGTATTACGCGCGCTC -3'                                                                            |
| <b>crRNA</b>         |                                                                                                       |
| CDR1-5'              | 5'- CTGCTCCTGCAGCGTAGCTG -3'                                                                          |
| CDR1-3'              | 5'- AGAAGAGATCCACCAGAGTA -3'                                                                          |
| MDR1-5'              | 5'- GCGGCTTAACTCAAATGTGG -3'                                                                          |
| MDR1-3'              | 5'- AAAGACGATGTAGCCCTGAT -3'                                                                          |
